# Supplementary material
Source: PubMed Central journal article supplement (PMC3627941)
Supplement: supp_00249.2012_tableS1.pdf [file supp_00249.2012_tableS1.pdf]

**Table S1**

| <b>Protein</b>                                                | <b>IFM Diab/IFM Control</b> | <b>IFM mPHGPx Diabetic/IFM Diabetic</b> |
|---------------------------------------------------------------|-----------------------------|-----------------------------------------|
| <b>Oxidative Phosphorylation</b>                              |                             |                                         |
| NADH dehydrogenase [ubiquinone] 1 alpha subcomplex subunit 10 | 0.77                        | 1.53                                    |
| NADH dehydrogenase [ubiquinone] 1 alpha subcomplex subunit 6  | NC                          | 1.63                                    |
| NADH dehydrogenase [ubiquinone] 1 alpha subcomplex subunit 7  | 0.77                        | NC                                      |
| NADH dehydrogenase [ubiquinone] 1 alpha subcomplex subunit 8  | NC                          | 1.57                                    |
| NADH dehydrogenase [ubiquinone] 1 beta subcomplex subunit 10  | 0.63                        | NC                                      |
| NADH dehydrogenase [ubiquinone] 1 beta subcomplex subunit 6   | 0.61                        | 1.6                                     |
| NADH dehydrogenase [ubiquinone] 1 beta subcomplex subunit 7   | NC                          | 2.28                                    |
| NADH dehydrogenase [ubiquinone] iron-sulfur protein 2         | NC                          | 1.75                                    |
| NADH dehydrogenase [ubiquinone] iron-sulfur protein 3         | NC                          | 1.41                                    |
| NADH-ubiquinone oxidoreductase 75 kDa subunit                 | 0.83                        | 1.42                                    |
| Succinate dehydrogenase [ubiquinone] flavoprotein subunit     | 0.86                        | 1.37                                    |
| Succinate dehydrogenase [ubiquinone] iron-sulfur subunit      | 0.84                        | 1.25                                    |
| Cytochrome b-c1 complex subunit 1                             | 0.79                        | 1.31                                    |
| Cytochrome b-c1 complex subunit 2                             | 0.82                        | 1.56                                    |

**Table 3**

|                                                                                                   |      |      |
|---------------------------------------------------------------------------------------------------|------|------|
| Cytochrome b-c1 complex subunit 8                                                                 | 0.73 | NC   |
| Cytochrome b-c1 complex subunit Rieske                                                            | NC   | 1.42 |
| Cytochrome c oxidase subunit 6                                                                    | 0.88 | NC   |
| Cytochrome c1, heme protein                                                                       | NC   | 1.37 |
| ATP synthase protein 8                                                                            | 0.55 | 1.95 |
| ATP synthase subunit alpha                                                                        | NC   | 1.57 |
| ATP synthase subunit epsilon                                                                      | NC   | 1.92 |
| ATP synthase subunit O                                                                            | 0.76 | NS   |
| Electron transfer flavoprotein subunit beta                                                       | 0.80 | 1.62 |
| <b>Lipid Metabolism</b>                                                                           |      |      |
| Acyl carrier protein                                                                              | 0.82 | 1.87 |
| Enoyl-CoA hydratase                                                                               | NC   | 1.91 |
| Hydroxyacyl-coenzyme A dehydrogenase                                                              | 0.71 | 2.06 |
| Short-chain specific acyl-CoA dehydrogenase                                                       | 0.69 | NC   |
| 3-ketoacyl-CoA thiolase                                                                           | NC   | 1.31 |
| <b>TCA cycle</b>                                                                                  |      |      |
| Dihydrolipoyllysine-residue succinyltransferase component of 2-oxoglutarate dehydrogenase complex | 0.75 | NC   |
| Aconitate hydratase                                                                               | NC   | 1.80 |

**Table 3**

|                                                  |      |      |
|--------------------------------------------------|------|------|
| Citrate synthase                                 | NC   | 2.07 |
| Isocitrate dehydrogenase 3 (NAD <sup>+</sup> )   | 0.74 | 3.5  |
| Malate dehydrogenase                             | NC   | 1.39 |
| NAD(P) transhydrogenase                          | NC   | 1.47 |
| <b>Transport</b>                                 |      |      |
| 60 kDa heat shock protein                        | NC   | 1.39 |
| ADP/ATP translocase                              | NC   | 1.59 |
| Mitochondrial heat shock protein 70              | 0.69 | 1.77 |
| Mitochondrial inner membrane protein             | 0.55 | 1.7  |
| Phosphate carrier protein                        | 0.81 | 1.66 |
| Voltage-dependent anion-selective channel 1      | NC   | 1.58 |
| Prohibitin-2                                     | 0.59 | NC   |
| <b>Amino Acid Metabolism</b>                     |      |      |
| Aspartate aminotransferase                       | NC   | 1.98 |
| <b>Oxidation/Reduction</b>                       |      |      |
| D-beta-hydroxybutyrate dehydrogenase             | 0.57 | 2.45 |
| <b>Ketone Metabolism</b>                         |      |      |
| Succinyl-CoA:3-ketoacid-coenzyme A transferase 1 | NC   | 2.05 |
| <b>Oxidative stress related</b>                  |      |      |
| Peroxiredoxin-5                                  | 0.73 | NC   |
