# Supplementary material
Source: PubMed Central journal article supplement (PMC3627941)
Supplement: supp_00249.2012_tableS2.pdf [file supp_00249.2012_tableS2.pdf]

Table S2.

| <b>IFM dia vs IFM Ctrl</b>                                                        |                                 |
|-----------------------------------------------------------------------------------|---------------------------------|
| <b>Entrez Gene Name</b>                                                           | <b>Entrez Gene ID for Mouse</b> |
| <b>Oxidative Phosphorylation</b>                                                  |                                 |
| ATP synthase, H+ transporting, mitochondrial F1 complex, O subunit                | 28080                           |
| cytochrome c oxidase subunit VIb polypeptide 1 (ubiquitous)                       | 110323                          |
| NADH dehydrogenase (ubiquinone) 1 alpha subcomplex, 7, 14.5kDa                    | 66416                           |
| NADH dehydrogenase (ubiquinone) 1 alpha subcomplex, 10, 42kDa                     | 67273                           |
| NADH dehydrogenase (ubiquinone) 1, alpha/beta subcomplex, 1, 8kDa                 | 70316                           |
| NADH dehydrogenase (ubiquinone) 1 beta subcomplex, 6, 17kDa                       | 230075                          |
| NADH dehydrogenase (ubiquinone) 1 beta subcomplex, 10, 22kDa                      | 68342                           |
| NADH dehydrogenase (ubiquinone) Fe-S protein 1, 75kDa (NADH-coenzyme Q reductase) | 227197                          |
| succinate dehydrogenase complex, subunit A, flavoprotein (Fp)                     | 66945                           |
| succinate dehydrogenase complex, subunit B, iron sulfur (Ip)                      | 67680                           |
| ubiquinol-cytochrome c reductase core protein I                                   | 22273                           |
| ubiquinol-cytochrome c reductase core protein II                                  | 67003                           |
| ubiquinol-cytochrome c reductase, complex III subunit VII, 9.5kDa                 | 22272                           |
| <b>Mitochondrial Dysfunction</b>                                                  |                                 |
| cytochrome c oxidase subunit VIb polypeptide 1 (ubiquitous)                       | 110323                          |
| NADH dehydrogenase (ubiquinone) 1 alpha subcomplex, 7, 14.5kDa                    | 66416                           |
| NADH dehydrogenase (ubiquinone) 1 alpha subcomplex, 10, 42kDa                     | 67273                           |
| NADH dehydrogenase (ubiquinone) 1, alpha/beta subcomplex, 1, 8kDa                 | 70316                           |
| NADH dehydrogenase (ubiquinone) 1 beta subcomplex, 6, 17kDa                       | 230075                          |
| NADH dehydrogenase (ubiquinone) 1 beta subcomplex, 10, 22kDa                      | 68342                           |
| NADH dehydrogenase (ubiquinone) Fe-S protein 1, 75kDa (NADH-coenzyme Q reductase) | 227197                          |
| peroxiredoxin 5                                                                   | 54683                           |
| succinate dehydrogenase complex, subunit A, flavoprotein (Fp)                     | 66945                           |
| succinate dehydrogenase complex, subunit B, iron sulfur (Ip)                      | 67680                           |
| ubiquinol-cytochrome c reductase core protein I                                   | 22273                           |
| ubiquinol-cytochrome c reductase core protein II                                  | 67003                           |
| <b>Fatty Acid Elongation in Mitochondria</b>                                      |                                 |
| hydroxyacyl-CoA dehydrogenase                                                     | 15107                           |
| <b>Citrate Cycle</b>                                                              |                                 |
| dihydrolipoamide S-succinyltransferase (E2 component of 2-oxo-glutarate complex)  | 78920                           |
| isocitrate dehydrogenase 3 (NAD+) gamma                                           | 15929                           |
| succinate dehydrogenase complex, subunit A, flavoprotein (Fp)                     | 66945                           |
| succinate dehydrogenase complex, subunit B, iron sulfur (Ip)                      | 67680                           |
| <b>IFM-mPHGPx dia vs IFM dia</b>                                                  |                                 |
| <b>Entrez Gene Name</b>                                                           | <b>Entrez Gene ID for Mouse</b> |
| <b>Oxidative Phosphorylation</b>                                                  |                                 |

|                                                                                                                 |        |
|-----------------------------------------------------------------------------------------------------------------|--------|
| ATP synthase, H <sup>+</sup> transporting, mitochondrial F1 complex, alpha subunit 1, cardiac muscle            | 11946  |
| ATP synthase, H <sup>+</sup> transporting, mitochondrial F1 complex, epsilon subunit                            | 67126  |
| cytochrome c-1                                                                                                  | 66445  |
| NADH dehydrogenase (ubiquinone) 1 alpha subcomplex, 6, 14kDa                                                    | 67130  |
| NADH dehydrogenase (ubiquinone) 1 alpha subcomplex, 8, 19kDa                                                    | 68375  |
| NADH dehydrogenase (ubiquinone) 1 alpha subcomplex, 10, 42kDa                                                   | 67273  |
| NADH dehydrogenase (ubiquinone) 1, alpha/beta subcomplex, 1, 8kDa                                               | 70316  |
| NADH dehydrogenase (ubiquinone) 1 beta subcomplex, 6, 17kDa                                                     | 230075 |
| NADH dehydrogenase (ubiquinone) 1 beta subcomplex, 7, 18kDa                                                     | 66916  |
| NADH dehydrogenase (ubiquinone) Fe-S protein 1, 75kDa (NADH-coenzyme Q reductase)                               | 227197 |
| NADH dehydrogenase (ubiquinone) Fe-S protein 2, 49kDa (NADH-coenzyme Q reductase)                               | 226646 |
| NADH dehydrogenase (ubiquinone) Fe-S protein 3, 30kDa (NADH-coenzyme Q reductase)                               | 68349  |
| succinate dehydrogenase complex, subunit A, flavoprotein (Fp)                                                   | 66945  |
| succinate dehydrogenase complex, subunit B, iron sulfur (Ip)                                                    | 67680  |
| ubiquinol-cytochrome c reductase core protein I                                                                 | 22273  |
| ubiquinol-cytochrome c reductase core protein II                                                                | 67003  |
| ubiquinol-cytochrome c reductase, Rieske iron-sulfur polypeptide 1                                              | 66694  |
| <b>Mitochondrial Dysfunction</b>                                                                                |        |
| ATP synthase, H <sup>+</sup> transporting, mitochondrial F1 complex, alpha subunit 1, cardiac muscle            | 11946  |
| cytochrome c-1                                                                                                  | 66445  |
| NADH dehydrogenase (ubiquinone) 1 alpha subcomplex, 6, 14kDa                                                    | 67130  |
| NADH dehydrogenase (ubiquinone) 1 alpha subcomplex, 8, 19kDa                                                    | 68375  |
| NADH dehydrogenase (ubiquinone) 1 alpha subcomplex, 10, 42kDa                                                   | 67273  |
| NADH dehydrogenase (ubiquinone) 1, alpha/beta subcomplex, 1, 8kDa                                               | 70316  |
| NADH dehydrogenase (ubiquinone) 1 beta subcomplex, 6, 17kDa                                                     | 230075 |
| NADH dehydrogenase (ubiquinone) 1 beta subcomplex, 7, 18kDa                                                     | 66916  |
| NADH dehydrogenase (ubiquinone) Fe-S protein 1, 75kDa (NADH-coenzyme Q reductase)                               | 227197 |
| NADH dehydrogenase (ubiquinone) Fe-S protein 2, 49kDa (NADH-coenzyme Q reductase)                               | 226646 |
| NADH dehydrogenase (ubiquinone) Fe-S protein 3, 30kDa (NADH-coenzyme Q reductase)                               | 68349  |
| succinate dehydrogenase complex, subunit A, flavoprotein (Fp)                                                   | 66945  |
| succinate dehydrogenase complex, subunit B, iron sulfur (Ip)                                                    | 67680  |
| ubiquinol-cytochrome c reductase core protein I                                                                 | 22273  |
| ubiquinol-cytochrome c reductase core protein II                                                                | 67003  |
| ubiquinol-cytochrome c reductase, Rieske iron-sulfur polypeptide 1                                              | 66694  |
| <b>Fatty Acid Elongation in Mitochondria</b>                                                                    |        |
| enoyl CoA hydratase, short chain, 1, mitochondrial                                                              | 93747  |
| hydroxyacyl-CoA dehydrogenase                                                                                   | 15107  |
| hydroxyacyl-CoA dehydrogenase/3-ketoacyl-CoA thiolase/enoyl-CoA hydratase (trifunctional protein), beta subunit | 231086 |
| <b>Citrate Cycle</b>                                                                                            |        |
| aconitase 2, mitochondrial                                                                                      | 11429  |

|                                                               |       |
|---------------------------------------------------------------|-------|
| citrate synthase                                              | 12974 |
| isocitrate dehydrogenase 3 (NAD+) gamma                       | 15929 |
| malate dehydrogenase 2, NAD (mitochondrial)                   | 17448 |
| succinate dehydrogenase complex, subunit A, flavoprotein (Fp) | 66945 |
| succinate dehydrogenase complex, subunit B, iron sulfur (Ip)  | 67680 |
| <b>Pyruvate Metabolism</b>                                    |       |
| malate dehydrogenase 2, NAD (mitochondrial)                   | 17448 |
