# Supplementary material
Source: PubMed Central journal article supplement (PMC3627941)
Supplement: supp_00249.2012_tableS3.pdf [file supp_00249.2012_tableS3.pdf]

**Table S3**

| <b>Protein</b>                                                       | <b>Peptide sequence</b>                      | <b>Modification</b>                      |
|----------------------------------------------------------------------|----------------------------------------------|------------------------------------------|
| <b>Outer Mitochondrial Membrane</b>                                  |                                              |                                          |
| Voltage-dependent anion-selective channel protein 2                  | VNSSLIGVGYTQTLRPGVK                          | Deamidated(N)@3                          |
| Voltage-dependent anion-selective channel protein 2                  | LTFDTTFSPNTGK                                | Deamidated(N)@10                         |
| Mitochondrial fission 1 protein                                      | MEAVLNELVSVEDLK                              | Protein Terminal Acetyl@N-term           |
| <b>Inner Mitochondrial Membrane</b>                                  |                                              |                                          |
| ATP synthase subunit alpha                                           | ELLGRVVDALGNAIDGK                            | <b>Oxidation(R)@5</b> ; Deamidated(N)@12 |
| ATP synthase, H <sup>+</sup> transporting, F1 complex, alpha subunit | VVDALGNAIDGKGPVGSK                           | Deamidated(N)@7; <b>Oxidation(P)@14</b>  |
| ATP synthase subunit beta                                            | IMDPNIVGNEHYDVAR                             | Deamidated(N)@9                          |
| ATP synthase subunit alpha                                           | VVDALGNAIDGK                                 | Deamidated(N)@7                          |
| ATP synthase subunit gamma                                           | QMKNEVAALTAAGK                               | Gln->pyro-Glu@N-term;<br>Deamidated(N)@4 |
| Cytochrome b-c1 complex subunit 2                                    | RGNNTTSLLSQSVAK                              | Deamidated(N)@3                          |
| Cytochrome b-c1 complex subunit 1                                    | TATFAQALQSVPETQVSILDNGLR                     | Deamidated(N)@21                         |
| Cytochrome b-c1 complex subunit 1                                    | EMQENDASMQNVVFDYLHATAFQGT<br>PLAQAVEGPESENVR | Deamidated(Q)@29                         |
| Cytochrome b-c1 complex subunit Rieske                               | MLSVAAR                                      | Protein Terminal Acetyl@N-term           |
| Cytochrome c1, heme protein                                          | ALAEVEVQDGPNDGEMFMRPGK                       | Deamidated(N)@13                         |

|                                                               |                       |                                  |
|---------------------------------------------------------------|-----------------------|----------------------------------|
| Cytochrome c oxidase subunit 5A                               | AWELRKGMNTLVGYDLVPEPK | Deamidated(N)@9                  |
| Cytochrome c oxidase subunit 5A                               | LNDFASAVR             | Deamidated(N)@2; Dehydrated(D)@3 |
| Cytochrome c oxidase subunit 5A                               | RLNDFASAVR            | Deamidated(N)@3                  |
| Cytochrome c oxidase subunit 5A                               | YEDSNLGTSHLLR         | Deamidated(N)@6                  |
| Cytochrome c oxidase subunit 6A2                              | GDHGGAGANTWR          | Deamidated(N)@9                  |
| NADH-ubiquinone oxidoreductase 75 kDa subunit                 | GWNILTNSEK            | Deamidated(N)@3                  |
| NADH-ubiquinone oxidoreductase 75 kDa subunit                 | SATYVNTEGR            | Deamidated(N)@6                  |
| NADH-ubiquinone oxidoreductase 75 kDa subunit                 | LTEPMVRNEK            | Deamidated(N)@8                  |
| NADH dehydrogenase [ubiquinone] 1 alpha subcomplex subunit 7  | NWASGQDLQAK           | Deamidated(N)@1                  |
| NADH dehydrogenase [ubiquinone] flavoprotein 2                | QNGWLPISAMNK          | Deamidated(N)@2                  |
| NADH dehydrogenase [ubiquinone] iron-sulfur protein 2         | IDEVEEMLTNNR          | Deamidated(N)@10                 |
| NADH dehydrogenase [ubiquinone] iron-sulfur protein 2         | LYTEGYQVPPGATYTAIEAPK | Deamidated(Q)@7                  |
| NADH dehydrogenase [ubiquinone] 1 alpha subcomplex subunit 9, | FIHVSHLNASK           | Deamidated(N)@8                  |
| NADH dehydrogenase [ubiquinone] iron-sulfur protein 4         | PKPKSKSYGANFSWNKR     | Deamidated(N)@15                 |
| NADH dehydrogenase [ubiquinone] iron-sulfur protein 4         | NGWSYDVEEK            | Deamidated(N)@1                  |

|                                              |                                        |                                                 |
|----------------------------------------------|----------------------------------------|-------------------------------------------------|
| Creatine kinase S-type, mitochondrial        | ENLRLQKRGTGGVDTAAVADVYDIS<br>NIDR      | Deamidated(R)@8; <b>Oxidation(D)</b> @14        |
| Chaperone activity of bc1 complex-like       | AAMLGDAIMVAK                           | Protein Terminal Acetyl@N-term                  |
| <b>Matrix-Associated Proteins</b>            |                                        |                                                 |
| Aconitase Hydratase                          | KGEKNTIVTSYNR                          | Deamidated(N)@5                                 |
| Aconitase Hydratase                          | LEAPDADELPR                            | Deamidated(N)@1                                 |
| Aconitase Hydratase                          | LNRPLTLSEK                             | Deamidated(N)@1                                 |
| 2-oxoglutarate dehydrogenase E1<br>component | HHVLHDQNVDKR                           | Deamidated(N)@8                                 |
| 2-oxoglutarate dehydrogenase E1<br>component | NGHNEMDEPMFTQPLMYK                     | Deamidated(N)@4;<br>Deamidated(Q)@13            |
| 2-oxoglutarate dehydrogenase E1<br>component | SWDIFFRNTNAGAPPGTAYQSPLSLS<br>R        | <b>Trioxidation(W)</b> @2;<br>Deamidated(N)@8   |
| 2-oxoglutarate dehydrogenase E1<br>component | VIPENGPAAQDPHK                         | Deamidated(N)@5                                 |
| 2-oxoglutarate dehydrogenase E1<br>component | VIPENGPAAQDPHKVK                       | Deamidated(N)@5                                 |
| 2-oxoglutarate dehydrogenase E1<br>component | NMEEEVAITR                             | Deamidated(N)@1                                 |
| Malate dehydrogenase                         | TEVVKAKAGAGSATLSMAYAGAR                | <b>Dioxidation(K)</b> @5                        |
| Malate dehydrogenase                         | NLGIGK                                 | Deamidated(N)@1                                 |
| 60 kDa heat shock protein                    | DKYKNIGAKLVQDVANNTNEEAGDG<br>TTTATVLAR | Didehydroretinylidene(K)@9;<br>Deamidated(N)@19 |

|                                                 |                                   |                                                                          |
|-------------------------------------------------|-----------------------------------|--------------------------------------------------------------------------|
| 60 kDa heat shock protein                       | TNEEAGDGTTTATVLAR                 | Deamidated(N)@2                                                          |
| Trifunctional enzyme subunit alpha              | INSPNSKVNTLNK                     | Deamidated(N)@5                                                          |
| Trifunctional enzyme subunit alpha              | MGLVDQLVEPLGPGIKSPEER             | Deamidated(Q)@6                                                          |
| Trifunctional enzyme subunit alpha              | GQQQVFKGLNDKVK                    | Deamidated(Q)@4                                                          |
| 78 kDa glucose-regulated protein                | LGGKLSSDKETMEK                    | Acetyl@N-term                                                            |
| 78 kDa glucose-regulated protein                | NQLTSNPENTVFDK                    | Deamidated(N)@1                                                          |
| Acetyl-CoA acetyltransferase                    | KMNISRQEQDTYALSSYTR               | Deamidated(Q)@7                                                          |
| Acetyl-CoA acetyltransferase                    | AGIPKEEVKEVYMGNVIQGGEGQAP<br>TR   | Deamidated(N)@15                                                         |
| Electron transfer flavoprotein subunit beta     | VKPDKSGVVTGDKHSMNPF               | Deamidated(N)@18                                                         |
| Very long-chain specific acyl-CoA dehydrogenase | EATQAVLDKPETLSSDASTR              | Deamidated(Q)@4                                                          |
| Very long-chain specific acyl-CoA dehydrogenase | LCDSWCIEAATR                      | Carbamidomethyl(C)@2;<br><b>Oxidation(W)</b> @5;<br>Carbamidomethyl(C)@6 |
| Long-chain specific acyl-CoA dehydrogenase      | KFFQEEVIPHTEWEK                   | Deamidated(Q)@4                                                          |
| Long-chain specific acyl-CoA dehydrogenase      | FIPQMTAGKCGIAIAMTEPGAGSDLQ<br>GVR | <b>Oxidation(P)</b> @3; Deamidated(Q)@4;<br>Carbamidomethyl(C)@10        |
| Medium-chain specific acyl-CoA dehydrogenase    | MWITNGGK                          | Deamidated(N)@5                                                          |
| Grp75                                           | QAVTNPNTFYATKR                    | Deamidated(N)@8                                                          |

|                                                                     |                                             |                                       |
|---------------------------------------------------------------------|---------------------------------------------|---------------------------------------|
| 3-ketoacyl-CoA thiolase                                             | DGTVTAGNASGVSDGAGAVIIASEDA<br>VKK           | Deamidated(N)@8                       |
| Enoyl-CoA hydratase                                                 | GKNSSVGLIQLNRPK                             | Deamidated(N)@3                       |
| Electron transfer flavoprotein subunit alpha                        | GQLRRAASLLRFQSTLVIAEHANDSL<br>APITLNTITAAGR | Deamidated(N)@23                      |
| 3,2-trans-enoyl-CoA isomerase                                       | EADIQNFTSFISK                               | Deamidated(N)@6                       |
| Methylmalonate-semialdehyde<br>dehydrogenase [acylating]            | IVNDNPYGNGTAIFFTNGATAR                      | Deamidated(N)@9;<br>Deamidated(N)@17  |
| Peroxiredoxin-5                                                     | FSMVIDNGIVK                                 | Dethiomethyl(M)@3;<br>Deamidated(N)@7 |
| Fatty acid-binding protein, heart                                   | ADAFVGTWK                                   | Protein Terminal Acetyl@N-term        |
| Coiled-coil-helix-coiled-coil-helix domain-<br>containing protein 3 | RVTFEADENENITVVK                            | Deamidated(N)@9                       |
| Delta-1-pyrroline-5-carboxylate<br>dehydrogenase                    | VANEPILAFSQGSPER                            | Deamidated(N)@3                       |
| 28S ribosomal protein S22                                           | LMTQAQLEEATR                                | Deamidated(Q)@4                       |
